# Supplementary material for: Prevalence of chronic conditions and multimorbidity in Estonia: a population-based cross-sectional study
Source: PubMed Central journal article supplement — BMJ Open. 2021 Oct 4;11(10):e049045. doi: 10.1136/bmjopen-2021-049045 (PMC8493909; doi:10.1136/bmjopen-2021-049045), 2021-10-04
Supplement: bmjopen-2021-049045supp001.pdf [file bmjopen-2021-049045supp001.pdf]

**Supplementary appendix.****Table 1.** List and prevalence of chronic conditions (in the total population and among MM patients) in the study.

| Disorder                                                                                                    | ICD-10 codes                                                                                                                                                         | Prevalence (%) |                   |
|-------------------------------------------------------------------------------------------------------------|----------------------------------------------------------------------------------------------------------------------------------------------------------------------|----------------|-------------------|
|                                                                                                             |                                                                                                                                                                      | Total          | among MM patients |
| Hypertension                                                                                                | [I10–I15]                                                                                                                                                            | 24.49          | 67.40             |
| Painful condition                                                                                           | [G44, R51] [M25.5]<br>[M42–M54] [M77]<br>[M79.1–79.9] [R10.1–<br>10.4] [R07.0–07.4] [R30]<br>[R52.0] [R52.1] [R52.2]<br>[R52.9] [S22.0] [S22.1]<br>[S12] [S32] [S72] | 12.37          | 32.30             |
| Rheumatoid arthritis,<br>other inflammatory<br>arthropathies and<br>systemic connective<br>tissue disorders | [M30–M36] [M05–M09,<br>M79.0] [M91] [M15–<br>M19]                                                                                                                    | 7.65           | 23.56             |
| Dyspepsia                                                                                                   | [K21, K25–K30]                                                                                                                                                       | 7.41           | 22.12             |
| Asthma                                                                                                      | [J45–J46] [J30]                                                                                                                                                      | 5.91           | 12.94             |
| Diabetes                                                                                                    | [E10–14]                                                                                                                                                             | 5.62           | 17.69             |
| Sleeping disorders                                                                                          | [F51, G47]                                                                                                                                                           | 5.11           | 15.80             |
| Thyroid disorders                                                                                           | [E01–05, E06.1–.9, E07]                                                                                                                                              | 4.72           | 12.93             |

|                                                                                |                                                                     |      |       |
|--------------------------------------------------------------------------------|---------------------------------------------------------------------|------|-------|
| Atrial fibrillation                                                            | [I44–I45, I47–I49]                                                  | 4.7  | 14.99 |
| Psoriasis or eczema                                                            | [L20] [L23] [L28] [L29]<br>[L40] [L50] [L56]                        | 4.17 | 8.25  |
| Anxiety and other<br>neurotic, stress-<br>related, and<br>somatoform disorders | [F40–F43, F45, F48]                                                 | 4.09 | 11.20 |
| Blindness and low<br>vision                                                    | [H17–18, H25–28, H31,<br>H33, H34.1–.9, H35–<br>H36, H43, H47, H54] | 3.62 | 11.39 |
| Ischaemic heart<br>diseases                                                    | [I20–I25]                                                           | 3.44 | 11.27 |
| Depression                                                                     | [F32–F33]                                                           | 3.32 | 9.21  |
| Heart failure                                                                  | [I50]                                                               | 3.24 | 10.65 |
| Glaucoma                                                                       | [H40–H42]                                                           | 3.17 | 9.86  |
| Cancer **                                                                      | C00–97, D00–09, D37–<br>48                                          | 3.05 | 8.84  |
| Prostate disorders                                                             | [N40] [N41]                                                         | 2.52 | 7.33  |
| Disorders of purine<br>and pyrimidine<br>metabolism                            | [E79, M10]                                                          | 2.07 | 6.56  |
| Anemia                                                                         | [D50–59, D60–D61,<br>D63–64]                                        | 1.88 | 4.75  |
| Obesity                                                                        | [E66]                                                               | 1.64 | 5.11  |

|                                                       |                                            |      |      |
|-------------------------------------------------------|--------------------------------------------|------|------|
| Noninflammatory disorders of the female genital tract | [N81] [N93] [N95]                          | 1.57 | 4.45 |
| Neuropathies                                          | [G50–G64]                                  | 1.56 | 4.78 |
| Disorders of vestibular function                      | [H81, H82, R42]                            | 1.52 | 4.75 |
| Stroke and transient ischaemic attack                 | [I60–66, I69, G45, I67.2]                  | 1.45 | 4.71 |
| Chronic obstructive pulmonary disease/bronchitis      | [J40–J44]                                  | 1.4  | 4.42 |
| Peripheral vascular disease                           | [I73.0] [I70]                              | 0.93 | 2.98 |
| Osteoporosis                                          | [M80, M81, M82]                            | 0.89 | 2.83 |
| Schizophrenia or bipolar disorder                     | [F20–F29] [F31]                            | 0.85 | 1.75 |
| Epilepsy                                              | [G40–G41]                                  | 0.84 | 1.84 |
| Hearing loss                                          | [H90–H91]                                  | 0.74 | 2.17 |
| Migraine                                              | [G43]                                      | 0.72 | 1.57 |
| Cholelithiasis / Cholecystitis                        | [K80, K81.1]                               | 0.5  | 1.47 |
| Dementia                                              | [F00, F01, F02, F03, F05.1, G30, G31, R54] | 0.48 | 1.48 |
| Chronic kidney disease                                | [N18–N19]                                  | 0.47 | 1.57 |

|                                                       |                     |      |      |
|-------------------------------------------------------|---------------------|------|------|
| Mental and behavioral disorders due to use of alcohol | [F10]               | 0.43 | 1.16 |
| Chronic liver disease                                 | [K70–74, K76]       | 0.42 | 1.31 |
| Valve disorders                                       | [I34–I37]           | 0.37 | 1.20 |
| Viral Hepatitis                                       | [B18]               | 0.36 | 1.02 |
| Irritable bowel syndrome                              | [K58]               | 0.33 | 0.97 |
| Parkinson's disease                                   | [G20, G21, G22]     | 0.31 | 0.97 |
| HIV                                                   | [Z21, B20–B24]      | 0.30 | 0.70 |
| disorders of the urinary system                       | [N39.3, N39.4, R32] | 0.27 | 0.84 |
| Calculus of kidney and ureter                         | [N20]               | 0.26 | 0.76 |
| Inflammatory bowel                                    | [K50–K52]           | 0.24 | 0.52 |
| Chronic sinusitis                                     | [J32]               | 0.21 | 0.57 |
| Diverticular disease of the intestine                 | [K57]               | 0.2  | 0.63 |
| Other psychoactive substance misuses                  | [F11–19]            | 0.16 | 0.45 |
| Treated constipation                                  | [K59.0]             | 0.16 | 0.42 |
| Multiple sclerosis                                    | [G35]               | 0.12 | 0.26 |
| Coagulation defects                                   | [D65-D69]           | 0.08 | 0.22 |
| Learning disability                                   | [F81]               | 0.06 | 0.08 |
| Anorexia or bulimia                                   | [F50]               | 0.05 | 0.13 |

---

|                |         |      |      |
|----------------|---------|------|------|
| Bronchiectasis | [J47]   | 0.05 | 0.16 |
| Celiac disease | [K90.0] | 0.03 | 0.07 |

---

\* [ ] repetition of diagnostic codes within the boundaries of brackets

\*\* Each cancer diagnosis code counted separately
